# Supplementary material for: Real-world experience with pembrolizumab in patients with advanced soft tissue sarcoma
Source: PubMed Central journal article supplement — Ann Transl Med. 2021 Feb;9(4):339. doi: 10.21037/atm-21-49 (PMC7944271; doi:10.21037/atm-21-49), 2021-02
Supplement: atm-09-04-339-dss.pdf [file atm-09-04-339-dss.pdf]

## Data Sharing Statement

|                     |                                                                                                                                                     |                                                                                                                  |
|---------------------|-----------------------------------------------------------------------------------------------------------------------------------------------------|------------------------------------------------------------------------------------------------------------------|
| <b>Article Info</b> | <a href="http://dx.doi.org/10.21037/atm-21-49">http://dx.doi.org/10.21037/atm-21-49</a>                                                             |                                                                                                                  |
| <b>Item</b>         | <b>Question</b>                                                                                                                                     | <b>Authors' Response<br/>(place "-" if not applicable)</b>                                                       |
| 1                   | Would you like to share data collected for your study to others?                                                                                    | Yes.                                                                                                             |
| 2                   | If not, would you like to share the reason for your decision?                                                                                       | -                                                                                                                |
| 3                   | What data in particular will be shared?                                                                                                             | The survival data in particular will be shared, and the data about severe adverse events could also be shared.   |
| 4                   | Any other documents will be shared? Such as study protocol, statistical analysis plan, informed consent form, clinical study report, analytic code. | Statistical analysis plan, informed consent form, and clinical study report will also be shared if requested.    |
| 5                   | When will data availability begin?                                                                                                                  | From the publication date.                                                                                       |
| 6                   | When will data availability end?                                                                                                                    | Two years within the publication date.                                                                           |
| 7                   | To whom will you share the data?                                                                                                                    | Medical oncologists who are interested in soft tissue sarcoma.                                                   |
| 8                   | For what type of analysis or purpose?                                                                                                               | For analysis to evaluate the safety and efficacy of anlotinib and pazopanib.                                     |
| 9                   | How or where can the data/documents be obtained?                                                                                                    | Emails could be sent to the address below to obtain the shared data: liujiayong_doc@163.com                      |
| 10                  | Any other restrictions?                                                                                                                             | We may balance the potential benefits and risks for each request and then provide the data that could be shared. |
